# Supplementary material
Source: MDPI journal article supplement (https://www.mdpi.com/1424-2818/16/4/208)
Supplement: s1 [file s1]

Supplementary Table S1. COI p-distances (%) between *D. dyabdar* and the analysed Cyclopoida species, taking into account the 1 and 2 codon positions

| Species                | <i>D. dyabdar</i> | <i>D. nanus</i> | <i>A. americanus</i> | <i>C. abyssorum</i> | <i>D. bisetosus</i> | <i>M. leuckarti</i> | <i>D. galbinus</i> | <i>D. belgicus</i> | <i>D. sp.</i> | <i>D. bicuspidatus</i> | <i>D. crassicaudis</i> | <i>D. thomasi</i> | <i>D. albus</i> | <i>D. eulitoralis</i> |
|------------------------|-------------------|-----------------|----------------------|---------------------|---------------------|---------------------|--------------------|--------------------|---------------|------------------------|------------------------|-------------------|-----------------|-----------------------|
| <i>D. dyabdar</i>      |                   |                 |                      |                     |                     |                     |                    |                    |               |                        |                        |                   |                 |                       |
| <i>D. nanus</i>        | 0.0331            |                 |                      |                     |                     |                     |                    |                    |               |                        |                        |                   |                 |                       |
| <i>A. americanus</i>   | 0.0331            | 0.0432          |                      |                     |                     |                     |                    |                    |               |                        |                        |                   |                 |                       |
| <i>C. abyssorum</i>    | 0.0331            | 0.0469          | 0.0400               |                     |                     |                     |                    |                    |               |                        |                        |                   |                 |                       |
| <i>D. bisetosus</i>    | 0.0393            | 0.0440          | 0.0396               | 0.0517              |                     |                     |                    |                    |               |                        |                        |                   |                 |                       |
| <i>M. leuckarti</i>    | 0.0413            | 0.0585          | 0.0436               | 0.0582              | 0.0437              |                     |                    |                    |               |                        |                        |                   |                 |                       |
| <i>D. galbinus</i>     | 0.0413            | 0.0262          | 0.0412               | 0.0337              | 0.0545              | 0.0524              |                    |                    |               |                        |                        |                   |                 |                       |
| <i>D. belgicus</i>     | 0.0455            | 0.0356          | 0.0364               | 0.0455              | 0.0423              | 0.0591              | 0.0273             |                    |               |                        |                        |                   |                 |                       |
| <i>D. sp. (VIG2)</i>   | 0.0496            | 0.0432          | 0.0364               | 0.0473              | 0.0536              | 0.0582              | 0.0337             | 0.0545             |               |                        |                        |                   |                 |                       |
| <i>D. bicuspidatus</i> | 0.0435            | 0.0406          | 0.0470               | 0.0585              | 0.0195              | 0.0485              | 0.0488             | 0.0429             | 0.0587        |                        |                        |                   |                 |                       |
| <i>D. crassicaudis</i> | 0.0482            | 0.0466          | 0.0335               | 0.0482              | 0.0226              | 0.0430              | 0.0533             | 0.0431             | 0.0421        | 0.0319                 |                        |                   |                 |                       |
| <i>D. thomasi</i>      | 0.0455            | 0.0615          | 0.0545               | 0.0436              | 0.0418              | 0.0473              | 0.0487             | 0.0545             | 0.0545        | 0.0372                 | 0.0559                 |                   |                 |                       |
| <i>D. albus</i>        | 0.0496            | 0.0585          | 0.0582               | 0.0691              | 0.0457              | 0.0509              | 0.0637             | 0.0636             | 0.0582        | 0.0518                 | 0.0516                 | 0.0618            |                 |                       |
| <i>D. eulitoralis</i>  | 0.0537            | 0.0375          | 0.0337               | 0.0524              | 0.0461              | 0.0599              | 0.0300             | 0.0409             | 0.0187        | 0.0400                 | 0.0378                 | 0.0524            | 0.0599          |                       |
| <i>D. konstantini</i>  | 0.0579            | 0.0383          | 0.0345               | 0.0613              | 0.0358              | 0.0498              | 0.0383             | 0.0364             | 0.0268        | 0.0376                 | 0.0249                 | 0.0613            | 0.0460          | 0.0153                |
